# Supplementary material for: AIGD-PFT: the first AI-driven global daily gap-free 4 km phytoplankton functional type data product from 1998 to 2023
Source: Copernicus journal article supplement (doi:10.5194/essd-16-4793-2024), 2024-10-23
Supplement: Supplementary file 1 [file essd-16-4793-2024-supplement.pdf]

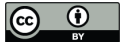

*Supplement of*

## **AIGD-PFT: the first AI-driven global daily gap-free 4 km phytoplankton functional type data product from 1998 to 2023**

**Yuan Zhang et al.**

*Correspondence to:* Fang Shen (fshen@sklec.ecnu.edu.cn)

The copyright of individual parts of the supplement might differ from the article licence.

Table S1 Reference and website for the publicly available in situ HPLC phytoplankton pigment dataset utilized in this study.

| No. | Coverage                | Period                 | Number | Website                                                                                                                                                               |
|-----|-------------------------|------------------------|--------|-----------------------------------------------------------------------------------------------------------------------------------------------------------------------|
| 1   | Global                  | Aug 2000 –<br>Apr 2018 | 4481   | <a href="https://doi.pangaea.de/10.1594/PANGAEA.938703">https://doi.pangaea.de/10.1594/PANGAEA.938703</a>                                                             |
| 2   | South Atlantic Ocean    | Nov 2000 –<br>Mar 2012 | 2173   | <a href="https://doi.pangaea.de/10.1594/PANGAEA.848591">https://doi.pangaea.de/10.1594/PANGAEA.848591</a>                                                             |
| 3   | Global                  | Nov 2004 –<br>Sep 2012 | 146    | <a href="https://doi.pangaea.de/10.1594/PANGAEA.937536">https://doi.pangaea.de/10.1594/PANGAEA.937536</a>                                                             |
| 4   | Global                  | Jul 2002 –<br>Feb 2012 | 484    | <a href="https://doi.pangaea.de/10.1594/PANGAEA.930087">https://doi.pangaea.de/10.1594/PANGAEA.930087</a>                                                             |
| 5   | Global                  | Dec 1988 –<br>Aug 2012 | 15216  | <a href="https://doi.pangaea.de/10.1594/PANGAEA.875879">https://doi.pangaea.de/10.1594/PANGAEA.875879</a>                                                             |
| 6   | Kuroshio region         | Oct 2009               | 206    | <a href="https://doi.pangaea.de/10.1594/PANGAEA.819108">https://doi.pangaea.de/10.1594/PANGAEA.819108</a>                                                             |
| 7   | Peruvian upwelling zone | Dec 2012               | 239    | <a href="https://doi.pangaea.de/10.1594/PANGAEA.864786">https://doi.pangaea.de/10.1594/PANGAEA.864786</a>                                                             |
| 8   | Fram Strait             | Jul 2017 –<br>Aug 2017 | 534    | <a href="https://doi.pangaea.de/10.1594/PANGAEA.894860">https://doi.pangaea.de/10.1594/PANGAEA.894860</a>                                                             |
| 9   | Australian Waters       | Dec 1997 –<br>present  | 6951   | <a href="https://portal.aodn.org.au/search?uuid=97b9fe73-ee44-437f-b2ae-5b8613f81042">https://portal.aodn.org.au/search?uuid=97b9fe73-ee44-437f-b2ae-5b8613f81042</a> |
| 10  | Eastern China seas      | 2015-2022              | 405    | -                                                                                                                                                                     |

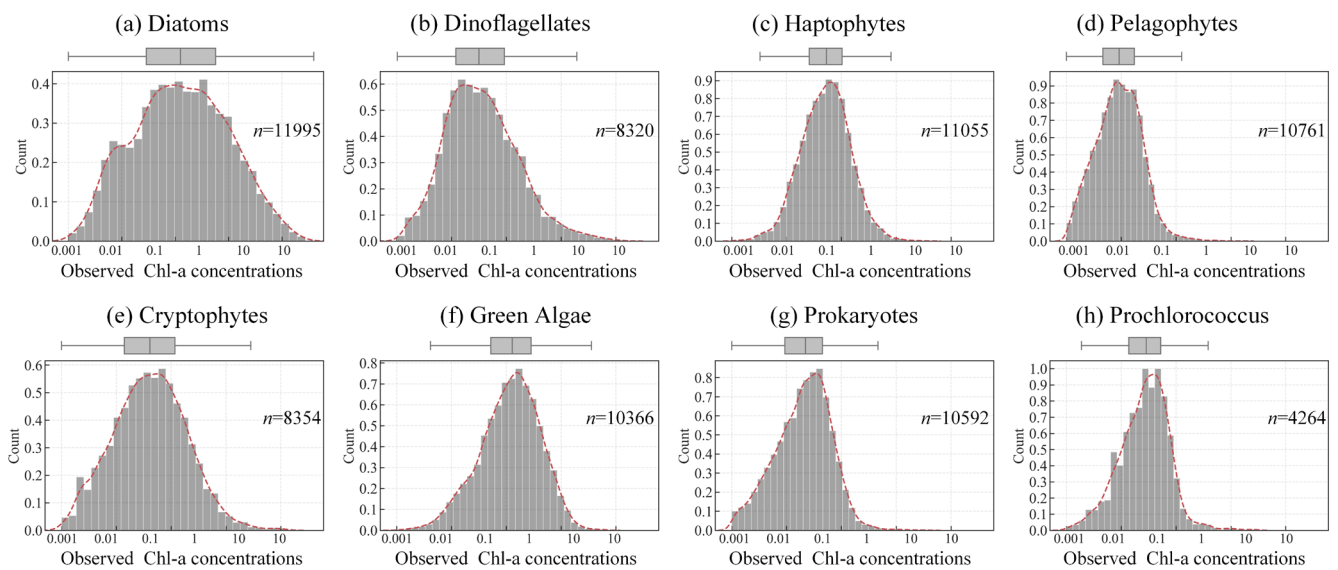

Figure S1 Log-scale histogram of Chl-a concentrations for eight PFTs and the number of in situ data points.

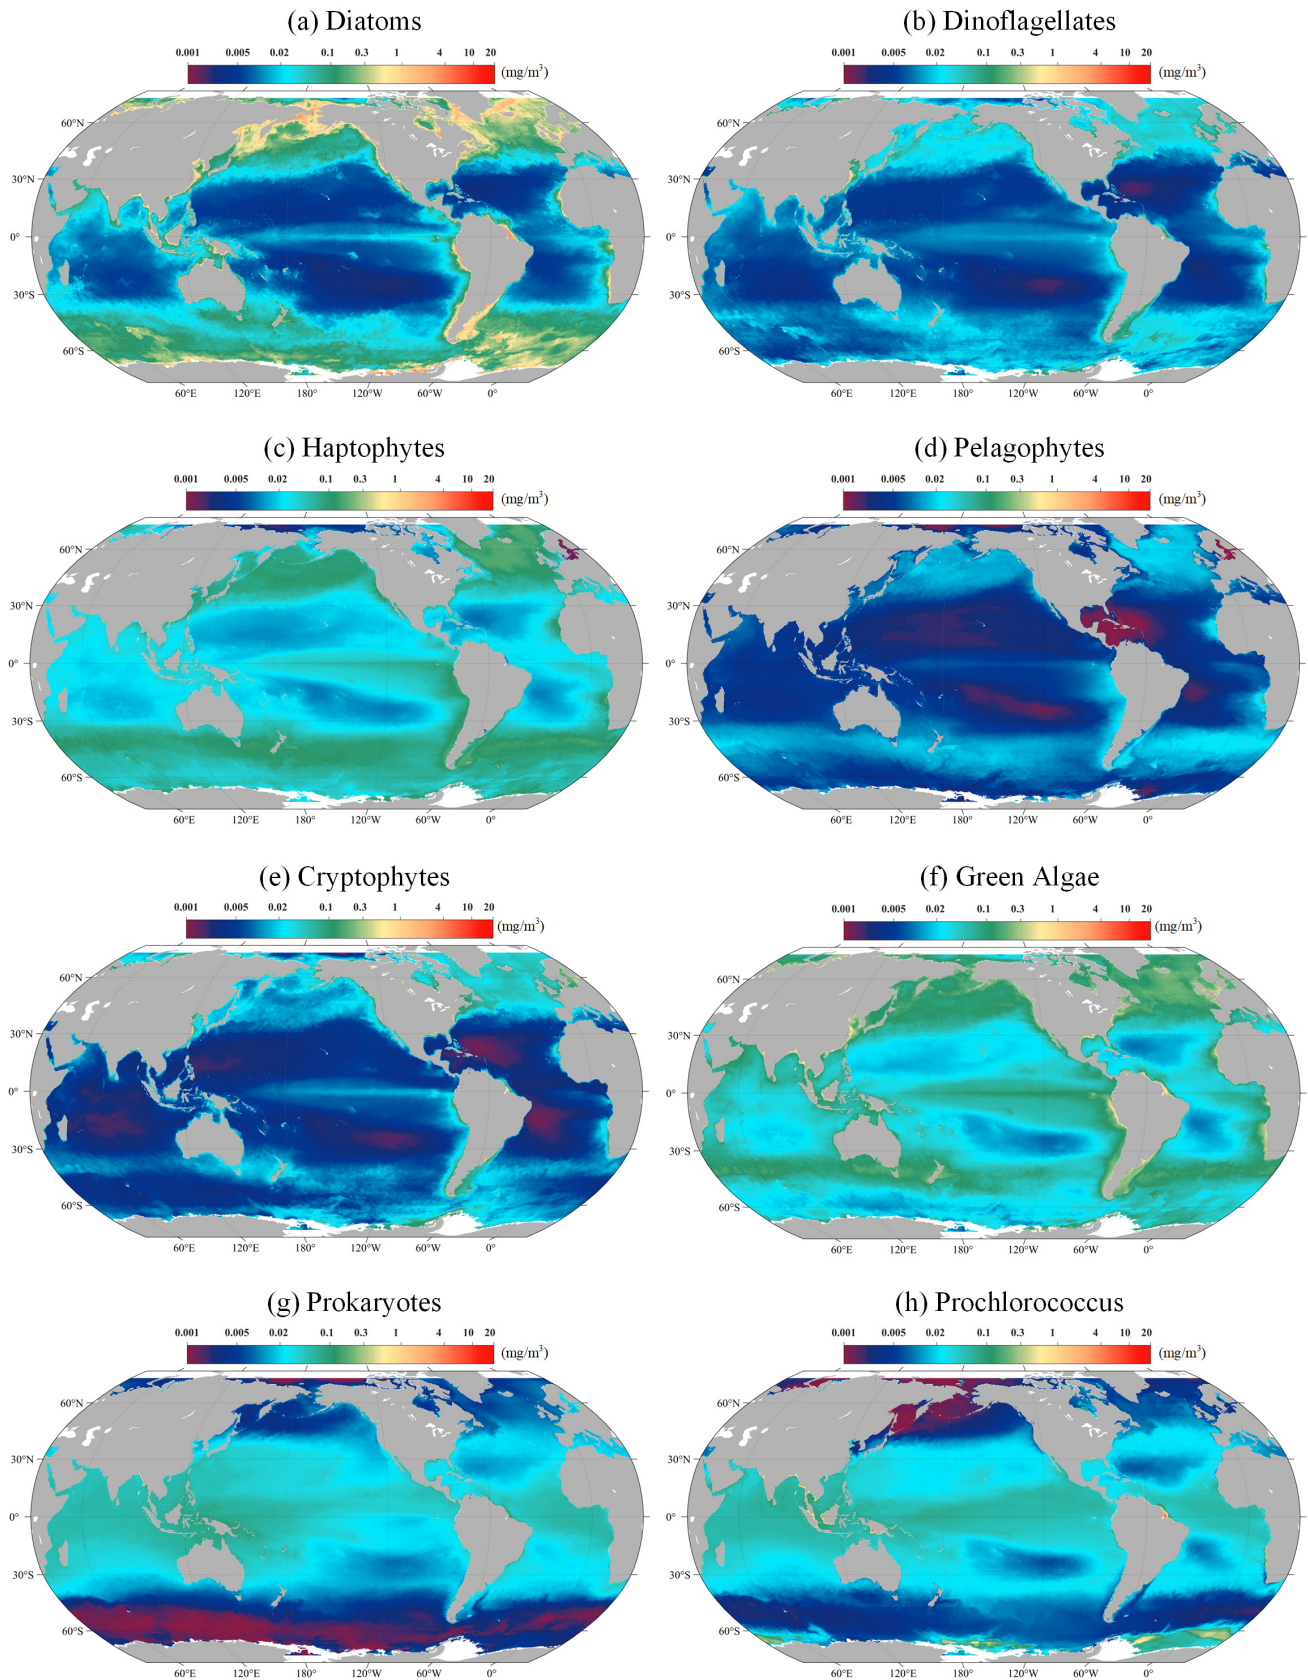

Figure S2 The yearly mean global distribution of Chl-a concentration in 2020 for (a) Diatoms, (b) Dinoflagellates, (c) Haptophytes, (d) Pelagophytes, (e) Cryptophytes, (f) Green Algae, (g) Prokaryotes and (h) Prochlorococcus. The grey areas represent lands.

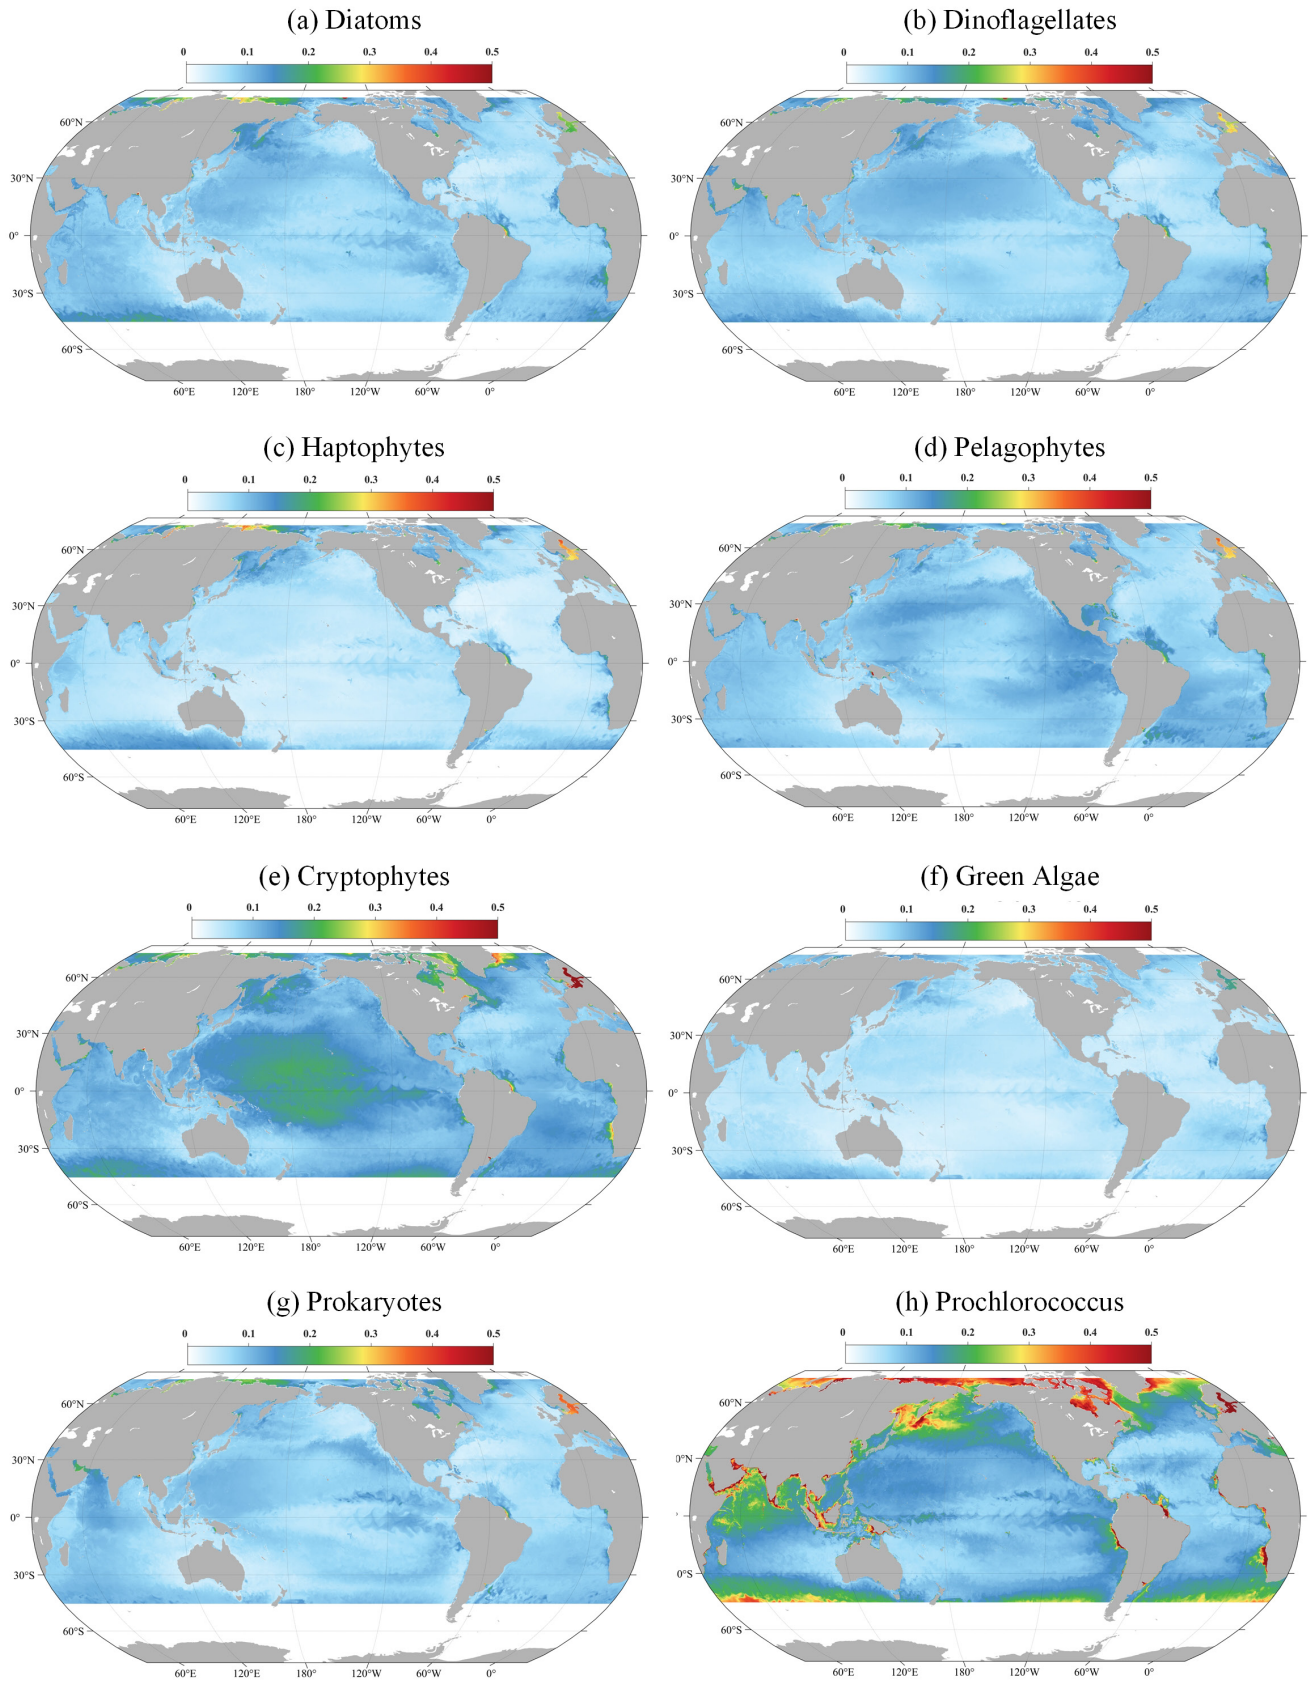

Figure S3 The global distribution (2020-07-10) of the uncertainties for (a) Diatoms, (b) Dinoflagellates, (c) Haptophytes, (d) Green Algae, (e) Prochlorococcus, (f) Prokaryotes, (g) Pelagophytes and (h) Cryptophytes.
